# Supplementary material for: Identification of genetic loci affecting body mass index through interaction with multiple environmental factors using structured linear mixed model
Source: PubMed Central journal article supplement (PMC7925554; doi:10.1038/s41598-021-83684-1), 2021-03-02
Supplement: 41598_2021_83684_MOESM2_ESM.pdf [file 41598_2021_83684_MOESM2_ESM.pdf]

**Identification of genetic loci affecting body mass index through interaction with multiple environmental factors using structured linear mixed model**

Hae-Un Jung<sup>1</sup>, Won Jun Lee<sup>1</sup>, Tae-Woong Ha<sup>1</sup>, Ji-One Kang<sup>2</sup>, Jihye Kim<sup>3</sup>, Mi Kyung Kim<sup>3,4</sup>, Sungho Won<sup>5</sup>, Taesung Park<sup>6</sup>, Ji Eun Lim<sup>2\*</sup> & Bermseok Oh<sup>2\*</sup>

<sup>1</sup>Department of Biomedical Science, School of Medicine, Kyung Hee University, Seoul, South Korea

<sup>2</sup>Department of Biochemistry and Molecular Biology, School of Medicine, Kyung Hee University, Seoul, South Korea

<sup>3</sup>Department of Preventive Medicine, College of Medicine, Hanyang University, Seoul, South Korea

<sup>4</sup>Department of Public Health Science, College of Medicine, Hanyang University, Seoul, South Korea

<sup>5</sup>Department of Public Health Science, Seoul National University, Seoul, South Korea

<sup>6</sup>Department of Statistics, Seoul National University, Seoul, South Korea

\*Corresponding author

Bermseok Oh

Department of Biochemistry and Molecular Biology, School of Medicine, Kyung Hee University, Seoul, South Korea.

Phone: +82 2-961-0617

E-mail: [ohbs@khu.ac.kr](mailto:ohbs@khu.ac.kr)

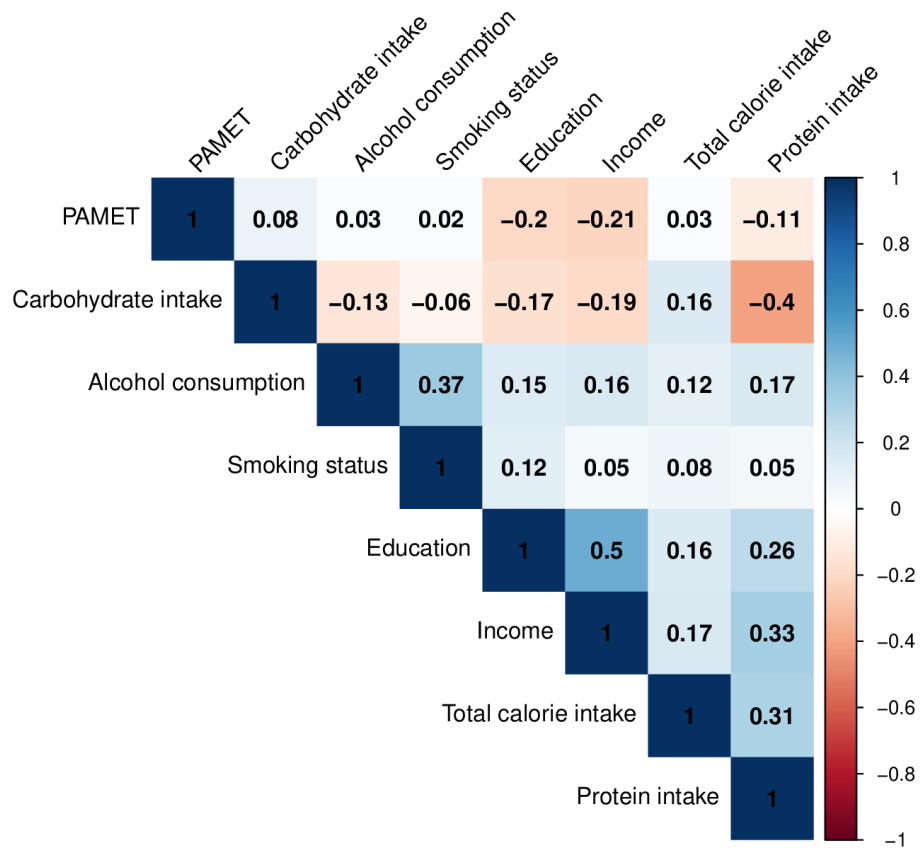

**Supplementary Figure 1.** Shown are the correlation coefficients between pairs of environmental factors, considering 8 body mass index (BMI)-related factors.

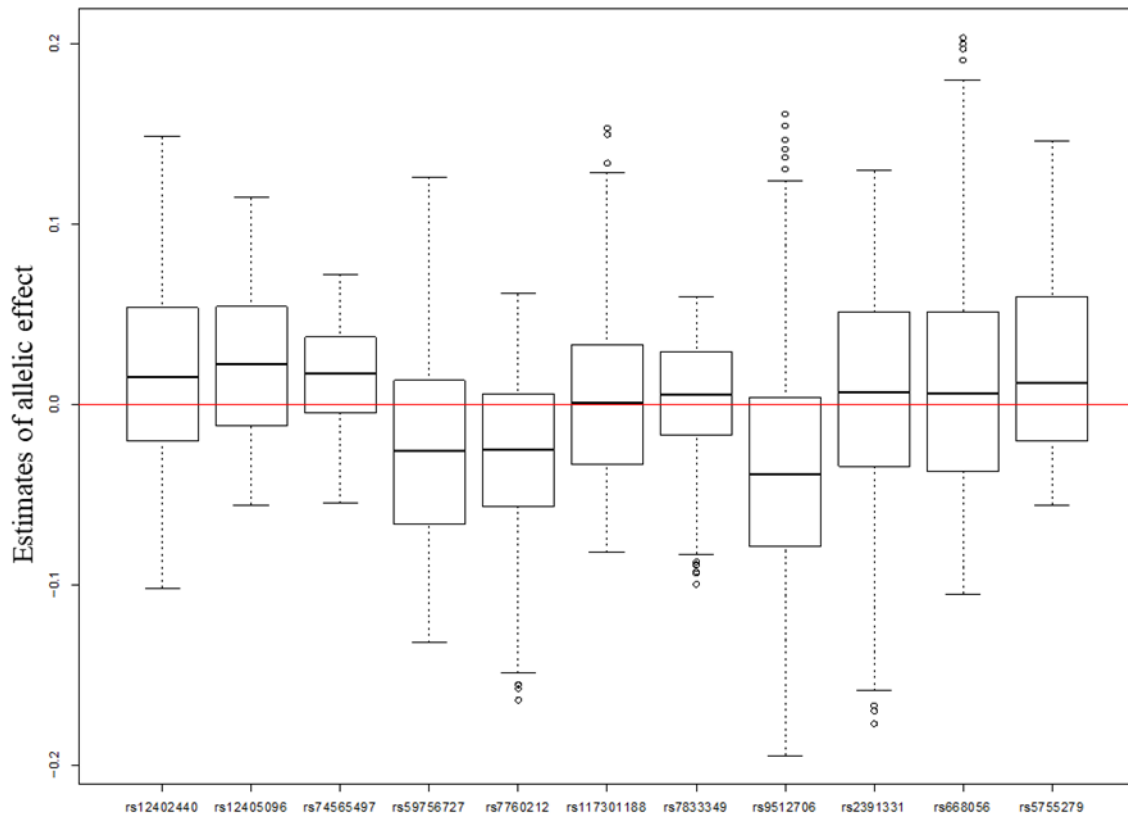

**Supplementary Figure 2.** Distribution of allelic effect in population considering both the allelic genetic effect and the interaction effect for 11 potential single nucleotide polymorphisms (SNPs).

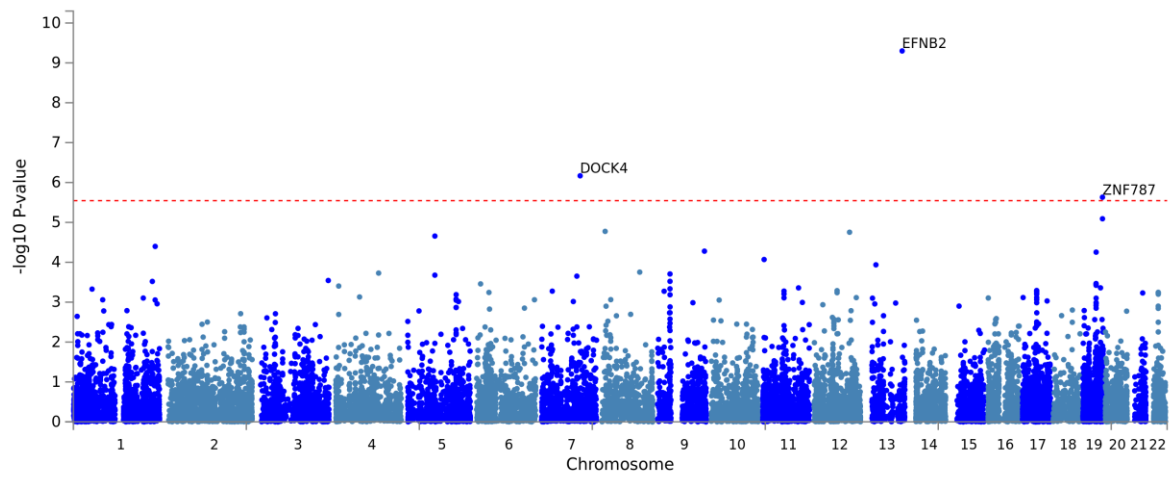

**Supplementary Figure 3.** Manhattan plots for gene-based genome-wide association analysis using MAGMA. The red line indicates the genome-wide significance threshold ( $P\text{-value} < 2.85 \times 10^{-6}$ ).
